# Supplementary material for: Effective conjugation in conjugated polymers with strongly twisted backbones: a case study on fluorinated MEHPPV
Source: Royal Society of Chemistry journal article supplement (doi:10.1039/c6tc01720g), 2016-01-01
Supplement: c6tc01720g1.pdf [file c6tc01720g1.pdf]

## Supporting Information

### Effective Conjugation in Conjugated Polymers with Strongly Twisted Backbones: a Case Study on Fluorinated MEHPPV

Rim Milad,<sup>1,2,3</sup> Junqing Shi,<sup>3</sup> Aranzazu Aguirre,<sup>3</sup> Antonio Cardone,<sup>4</sup> Begoña Milián-Medina,<sup>3,5,\*</sup> Gianluca M. Farinola,<sup>6</sup> Manef Abderrabba,<sup>1</sup> and Johannes Gierschner<sup>3,\*</sup>

<sup>1</sup> *Université de Carthage, Unité de Recherche, Laboratoire Matériaux, Molécules et applications, Institut Préparatoire aux études scientifiques et techniques IPEST, BP 51, 2070 La Marsa, Tunisia*

<sup>2</sup> *Université de Carthage, Faculté des sciences de Bizerte (FSB), Jarzouna, Bizerte 7021, Tunisia*

<sup>3</sup> *Madrid Institute for Advanced Studies, IMDEA Nanoscience, c/ Faraday 9, Ciudad Universitaria de Cantoblanco, 28049 Madrid, Spain*

<sup>4</sup> *Istituto di Chimica dei Composti OrganoMetallici ICCOM di Bari, Consiglio Nazionale delle Ricerche CNR, via Orabona 4, 70126-Bari, Italy*

<sup>5</sup> *Department for Physical Chemistry, Faculty of Chemistry, University of Valencia, Avda. Dr. Moliner 50, 46100 Burjassot (Valencia), Spain*

<sup>6</sup> *Dipartimento di Chimica, Università degli Studi di Bari "Aldo Moro", Via Orabona 4, Bari 70125, Italy*

\* E-mail: milian@uv.es, johannes.gierschner@imdea.org

| conformer-1                                                                       | conformer-2                                                                       | conformer-3                                                                        |
|-----------------------------------------------------------------------------------|-----------------------------------------------------------------------------------|------------------------------------------------------------------------------------|
| 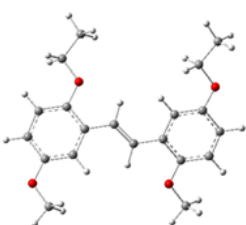 |  |  |
| $\Delta E: 0$                                                                     | $\Delta E: 0.091$                                                                 | $\Delta E: 0.088$                                                                  |

**Figure S1:** Conformers obtained for the two ring oligomer of MEHPPV with relative energies  $\Delta E$  (in  $\text{Kcal.mol}^{-1}$ ) calculated at B3LYP/6-311 G (d).

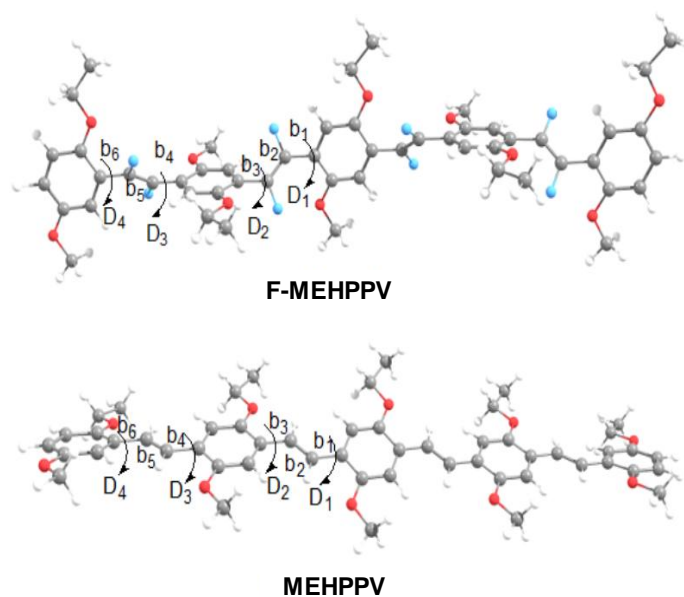

**Fig S2:** DFT (B3LYP) calculated ground state geometry of MEHPPV and F-MEHPPV oligomers with  $n = 4$ , indicating bond lengths  $b_i$  and torsional angle  $D_i$ .

**Table S1:** (TD)DFT (B3LYP) calculated phenyl-vinyl single bonds bond lengths ( $\text{\AA}$ ) and dihedral angles ( $^\circ$ ) calculated for MEHPPV and F-MEHPPV oligomers with  $n = 4$ , in the  $S_0$  and  $S_1$ .

| n=4   | MEHPPV |       | F-MEHPPV |       |
|-------|--------|-------|----------|-------|
|       | $S_0$  | $S_1$ | $S_0$    | $S_1$ |
| $b_1$ | 1.456  | 1.425 | 1.463    | 1.425 |
| $b_2$ | 1.351  | 1.379 | 1.341    | 1.379 |
| $b_3$ | 1.456  | 1.427 | 1.467    | 1.435 |
| $b_4$ | 1.458  | 1.438 | 1.467    | 1.450 |
| $b_5$ | 1.349  | 1.362 | 1.341    | 1.356 |
| $b_6$ | 1.461  | 1.448 | 1.468    | 1.460 |
| $D_1$ | 7.450  | 0     | 46.4     | 35.2  |
| $D_2$ | 8.4    | 0     | 46.7     | 27.6  |
| $D_3$ | 9.4    | 0     | 44.6     | 33.2  |
| $D_4$ | 10.8   | 0     | 46.2     | 39.4  |

**Table S2:** First singlet S1 excited state (vertical transitions energies) computed for MEHPPV and F-MEHPPV oligomers ( $n$  = number of repeat units) at different levels of theory (pl = planar geometry ; npl = non planar geometry). Singlet oscillator strength ( $f$ ) and configuration interaction (CI) description (with contribution  $\geq 5\%$ ) are listed.

|                       | $n$ | Method                     | E/ eV<br>( $\lambda$ nm) | $f$                                        | CI description                             |
|-----------------------|-----|----------------------------|--------------------------|--------------------------------------------|--------------------------------------------|
| MEHPPV                | 1   | TD- B3LYP // B3LYP/ npl    | 3.35 (370)               | 0.61                                       | H→L (96%)                                  |
|                       |     | TD- B3LYP // B3LYP/ pl     | 3.31 (375)               | 0.64                                       | H→L (96%)                                  |
|                       |     | TD-B3LYP// M06HF/ npl      | 4.08 (303)               | 0.86                                       | H→L (90%)                                  |
|                       |     | TD-M06HF // M06HF/ npl     | 4.39 (282)               | 0.77                                       | H-1→L+1(8%)<br>H→L (86%)                   |
|                       |     | TD-M06HF // M06HF/ pl      | 4.16 (298)               | 0.84                                       | H-1→L+1 (5%)<br>H→L (90%)                  |
|                       |     | TD-CAM-B3LYP // B3LYP/ npl | 3.74 (331)               | 0.76                                       | H→L (94%)                                  |
|                       |     | TD-CAM-B3LYP// B3LYP/ pl   | 3.68 (337)               | 0.79                                       | H→L (94%)                                  |
|                       | 2   | TD- B3LYP// B3LYP/ npl     | 2.73 (453)               | 1.48                                       | H→L (99%)                                  |
|                       |     | TD- B3LYP//B3LYP/ pl       | 2.71 (456)               | 1.51                                       | H→L (99%)                                  |
|                       |     | TD-B3LYP// M06HF/ npl      | 3.47 (357)               | 1.71                                       | H-1→L+1 (7%)<br>H→L (86%)                  |
|                       |     | TD-M06HF//M06HF/ npl       | 3.93 (315)               | 1.52                                       | H→L (82%)<br>H-1→L+1 (8%)                  |
|                       |     | TD-M06HF//M06HF/ pl        | 3.65 (339)               | 1.65                                       | H-1→L+1(7%)<br>H→L (84%)                   |
|                       |     | TD-CAM-B3LYP // B3LYP/ npl | 3.13(396)                | 1.64                                       | H→L (92%)                                  |
|                       |     | TD-CAM-B3LYP // B3LYP/ pl  | 3.11(399)                | 1.66                                       | H→L (92%)                                  |
|                       | 3   | TD- B3LYP//B3LYP/ npl      | 2.41 (513)               | 2.25                                       | H→L (99%)                                  |
|                       |     | TD- B3LYP//B3LYP/ pl       | 2.38 (519)               | 2.29                                       | H→L (99%)                                  |
|                       |     | TD-B3LYP// M06HF/ npl      | 3.21 (385)               | 2.56                                       | H-1→L+1 (12%)<br>H→L (79%)                 |
|                       |     | TD-M06HF//M06HF/ npl       | 3.74 (331)               | 2.29                                       | H-1→L+1 (12%)<br>H→L (74%)                 |
|                       |     | TD-M06HF//M06HF/ pl        | 3.42(362)                | 2.48                                       | H-1→L+1 (13%)<br>H→L (77%)                 |
|                       |     | TD-CAM-B3LYP// B3LYP/ npl  | 2.86 (433)               | 2.49                                       | H-1→L+1 (8%)<br>H→L (87%)                  |
|                       |     | TD-CAM-B3LYP// B3LYP/ pl   | 2.82 (438)               | 2.52                                       | H-1→L+1 (8%)<br>H→L (87%)                  |
|                       | 4   | TD- B3LYP// B3LYP/ npl     | 2.21 (559)               | 2.95                                       | H→L (98.46%)                               |
|                       |     | TD- B3LYP// B3LYP/ pl      | 2.18 (566)               | 3                                          | H→L (98.46%)                               |
|                       |     | TD-B3LYP// M06HF/ npl      | 3.07 (404)               | 3.41                                       | H-1→L+1 (15%)<br>H→L (72%)                 |
|                       |     | TD-M06HF//M06HF/ npl       | 3.65 (339)               | 3.08                                       | H-2→L+2 (5%)<br>H-1→L+1 (16%)<br>H→L (66%) |
|                       |     | TD-M06HF//M06HF/ pl        | 3.30 (375)               | 3.32                                       | H-1→L+1 (16%)<br>H→L (69%)                 |
|                       |     | TD-CAM-B3LYP // B3LYP/ npl | 2.7 (459)                | 3.33                                       | H-1→L (11%)<br>H→L (82%)                   |
|                       |     | TD-CAM-B3LYP // B3LYP/ pl  | 2.66 (465)               | 3.37                                       | H-1→L+1 (11%)<br>H→L (82%)                 |
|                       | 6   | TD- B3LYP// B3LYP/ npl     | 2.03 (610)               | 4.18                                       | H→L (96%)                                  |
|                       |     | TD- B3LYP// B3LYP/ pl      | 1.97 (628)               | 4.31                                       | H→L (96%)                                  |
| TD-B3LYP// M06HF/ npl |     | 2.95 (419)                 | 5.06                     | H-2→L+2 (8%)<br>H-1→L+1 (19%)<br>H→L (59%) |                                            |
| TD-M06HF//M06HF/ npl  |     | 3.52 (352)                 | 4.49                     | H-2→L+2 (9%)<br>H-1→L+1 (18%)              |                                            |

|                            |                      |                            |             |                            |                                                             |                                            |
|----------------------------|----------------------|----------------------------|-------------|----------------------------|-------------------------------------------------------------|--------------------------------------------|
| <b>F-MEHPV</b>             |                      |                            |             |                            | H→L (54%)                                                   |                                            |
|                            |                      | TD-M06HF//M06HF/ pl        | 3.18 (389)  | 4.96                       | H-2→L+2 (8%)<br>H-1→L+1 (19%)<br>H→L (56%)                  |                                            |
|                            |                      | TD-CAM-B3LYP // B3LYP/ npl | 2.57 (482)  | 4.94                       | H-2→L+2 (5%)<br>H-1→L+1 (16%)<br>H→L (70%)                  |                                            |
|                            |                      |                            |             |                            |                                                             | H-2→L+2 (5%)<br>H-1→L+1 (16%)<br>H→L (72%) |
|                            | 9                    | TD- B3LYP// B3LYP/ npl     | 1.86 (664)  | 6.13                       | H-1→L+1 (7%)<br>H→L (90%)                                   |                                            |
|                            |                      | TD- B3LYP// B3LYP/ pl      | 1.83 (675)  | 6.22                       | H-1→L+1 (7%)<br>H→L (90%)                                   |                                            |
|                            |                      | TD-B3LYP// M06HF/ npl      | 2.83 (437)  | 7.59                       | H-3→L+3 (6%)<br>H-2→L+2 (11%)<br>H-1→L+1 (19%)<br>H→L (46%) |                                            |
|                            |                      | TD-M06HF// M06HF/ npl      | 3.48 (356)  | 6.90                       | H-3→L+3 (7%)<br>H-2→L+2 (11%)<br>H-1→L+1 (18%)<br>H→L (40%) |                                            |
|                            |                      | TD-M06HF// M06HF/ pl       | 3.10 (399)  | 7.40                       | H-3→L+3 (7%)<br>H-2→L+2 (11%)<br>H-1→L+1 (19%)<br>H→L (43%) |                                            |
|                            |                      | TD-CAM-B3LYP // B3LYP/ npl | 2.43(509)   | 7.46                       | H-2→L+2 (9%)<br>H-1→L+1 (19%)<br>H→L (58%)                  |                                            |
|                            |                      | TD-CAM-B3LYP // B3LYP/ pl  | 2.40 (516)  | 7.56                       | H-2→L+2 (9%)<br>H-1→L+1 (19%)<br>H→L (58%)                  |                                            |
|                            | 12                   | TD- B3LYP// B3LYP/ npl     | 1.80 (687)  | 8.09                       | H-1→L+1 (11%)<br>H→L (83%)                                  |                                            |
|                            |                      | TD- B3LYP// B3LYP/ pl      | 1.77 ( 698) | 8.2                        | H-1→L+1 (11%)<br>H→L (83%)                                  |                                            |
|                            |                      | TD-CAM-B3LYP // B3LYP/ npl | 2.38 (520)  | 10                         | H-3→L+3 (6%)<br>H-2→L+2 (11%)<br>H-1→L+1 (19%)<br>H→L (47%) |                                            |
|                            |                      | TD-CAM-B3LYP // B3LYP/ pl  | 2.36 (525)  | 10                         | H-3→L+3 (6%)<br>H-2→L+2 (11%)<br>H-1→L+1 (20%)<br>H→L (47%) |                                            |
|                            | 1                    | TD- B3LYP// B3LYP/ npl     | 3.58 (346)  | 0.45                       | H→L (98%)                                                   |                                            |
|                            |                      | TD- B3LYP// B3LYP/ pl      | 3.35 (369)  | 0.64                       | H→L (97%)                                                   |                                            |
|                            |                      | TD-B3LYP// M06HF/ npl      | 4.42 (280)  | 0.64                       | H-1→L+1 (10%)<br>H→L (83%)                                  |                                            |
|                            |                      | TD-M06HF// M06HF/ npl      | 4.71 (264)  | 0.57                       | H-1→L+1 (12%)<br>H→L (80%)                                  |                                            |
|                            |                      | TD-M06HF// M06HF/ pl       | 4.31 (288)  | 0.8                        | H-1→L+1 (8%)<br>H→L (87%)                                   |                                            |
| TD-CAM-B3LYP // B3LYP/ npl |                      | 4.02 (308)                 | 0.56        | H-1→L+1 (6%)<br>H→L (90%)  |                                                             |                                            |
| TD-CAM-B3LYP // B3LYP/ pl  |                      | 3.72 (334)                 | 0.84        | H→L (95%)                  |                                                             |                                            |
| 2                          |                      | TD- B3LYP// B3LYP/ npl     | 3.16 (392)  | 0.97                       | H→L (98%)                                                   |                                            |
|                            |                      | TD- B3LYP// B3LYP/ pl      | 2.74 (452)  | 1.48                       | H→L (99%)                                                   |                                            |
|                            | TD-B3LYP// M06HF/npl | 4.06 (305)                 | 1.24        | H-2→L (5%)<br>H-1→L+1 (7%) |                                                             |                                            |

|  |                            |                            |                        |            |                                                           |
|--|----------------------------|----------------------------|------------------------|------------|-----------------------------------------------------------|
|  |                            |                            |                        |            | H→L (76%)                                                 |
|  |                            | TD-M06HF// M06HF/ npl      | 4.39(282)              | 1.24       | H→L (66%)<br>H-1→L+1 (12%)<br>H-2→L (7%)                  |
|  |                            | TD-M06HF// M06HF/ pl       | 3.85 (322)             | 1.58       | H→L (81%)<br>H-1→L+1 (8%)                                 |
|  |                            | TD-CAM-B3LYP // B3LYP/ npl | 3.65 (339)             | 1.13       | H→L (85%)<br>H-1→L+1 (5%)                                 |
|  |                            | TD-CAM-B3LYP // B3LYP/ pl  | 3.16 (392)             | 1.70       | H→L (92%)                                                 |
|  | 3                          | TD- B3LYP// B3LYP/ npl     | 3 (413)                | 1.42       | H→L (97%)                                                 |
|  |                            | TD- B3LYP// B3LYP/ pl      | 2.42 (511)             | 2.22       | H→L (99%)                                                 |
|  |                            | TD-B3LYP// M06HF/ npl      | 3.96 (313)             | 1.89       | H→L (66%)<br>H-1→L+1 (13%)                                |
|  |                            | TD-M06HF// M06HF/ npl      | 4.29 (289)             | 1.80       | H→L (56%)<br>H-1→L+1 (15%)                                |
|  |                            | TD-M06HF// M06HF/ pl       | 3.64 (340)             | 2.46       | H→L (74%)<br>H-1→L+1 (13%)                                |
|  |                            | TD-CAM-B3LYP // B3LYP/ npl | 3.54(350)              | 1.73       | H→L (77%)<br>H-1→L+1 (10%)                                |
|  |                            | TD-CAM-B3LYP // B3LYP/ pl  | 2.89 (428)             | 2.58       | H→L (87%)<br>H-1→L+1 (8%)                                 |
|  |                            | 4                          | TD- B3LYP// B3LYP/ npl | 2.87 (431) | 1.83                                                      |
|  | TD- B3LYP// B3LYP/ pl      |                            | 2.24 (554)             | 2.89       | H→L (98%)                                                 |
|  | TD-B3LYP// M06HF/ npl      |                            | 3.85 (322)             | 2.43       | H→L (62%)<br>H-1→L+1 (12%)                                |
|  | TD-M06HF// M06HF/ npl      |                            | 4.20 (295)             | 2.44       | H→L (45%)<br>H-1→L (8%)<br>H-1→L+1 (13%)                  |
|  | TD-M06HF// M06HF/ pl       |                            | 3.45 (359)             | 3.53       | H→L (67%)<br>H-1→L+1 (16%)                                |
|  | TD-CAM-B3LYP // B3LYP/ npl |                            | 3.42 (362)             | 2.24       | H→L (74%)<br>H-1→L+1 (11%)                                |
|  | TD-CAM-B3LYP // B3LYP/ pl  |                            | 2.74 (452)             | 3.45       | H→L (81%)<br>H-1→L+1 (11%)                                |
|  | 6                          | TD- B3LYP// B3LYP/ npl     | 2.74 (452)             | 2.69       | H→L (90%)<br>H-1→L+1 (6%)                                 |
|  |                            | TD- B3LYP// B3LYP/ pl      | 2.04 (607)             | 4.13       | H→L (96%)                                                 |
|  |                            | TD-B3LYP// M06HF/ npl      | 3.75 (331)             | 3.61       | H→L (52%)<br>H-1→L+1 (12%)<br>H-2→L+2 (7%)                |
|  |                            | TD-M06HF// M06HF/ npl      | 4.15 (299)             | 3.61       | H→L (35%)<br>H-1→L+1 (13%)<br>H-2→L (18%)<br>H-2→L+2 (7%) |
|  |                            | TD-M06HF// M06HF/ pl       | 3.34 (371)             | 5.28       | H→L (54%)<br>H-1→L+1 (19%)<br>H-2→L+2 (9%)                |
|  |                            | TD-CAM-B3LYP // B3LYP/ npl | 3.31 (374)             | 3.36       | H→L (63%)<br>H-1→L+1 (12%)<br>H-2→L+2 (6%)                |
|  |                            | TD-CAM-B3LYP // B3LYP/ pl  | 2.59 (478)             | 5.16       | H→L (70%)<br>H-1→L+1 (16%)<br>H-2→L+2 (5%)                |
|  | 9                          | TD- B3LYP// B3LYP/ npl     | 2.7 (459)              | 4.34       | H→L (71%)<br>H-1→L+1 (19%)                                |
|  |                            | TD- B3LYP//B3LYP/ pl       | 1.92 (645)             | 6          | H→L (90%)<br>H-1→L+1 (8%)                                 |
|  |                            | TD-B3LYP// M06HF/npl       | 3.72 (333)             | 6.1        | H→L (9%)<br>H-2→L+2 (9%)<br>H-3→L+3 (6%)                  |

|  |  |                            |            |      |                                                            |
|--|--|----------------------------|------------|------|------------------------------------------------------------|
|  |  |                            |            |      | H-1→L+1 (22%)<br>H→L (31%)                                 |
|  |  | TD-M06HF// M06HF/ npl      | 4.10 (302) | 5.57 | H-2→L+1 (9%)<br>H-1→L (9%)<br>H→L (22%)<br>H→L+1 (6%)      |
|  |  | TD-M06HF// M06HF/ pl       | 3.37 (368) | 7.62 | H-3→L+3 (7%)<br>H-2→L+2 (11%)<br>H-1→L+1 (40%)             |
|  |  | TD-CAM-B3LYP // B3LYP/ npl | 3.28 (377) | 5.61 | H-3→L+3 (5%)<br>H-2→L+2 (9%)<br>H-1→L+1 (24%)<br>H→L (40%) |
|  |  | TD-CAM-B3LYP // B3LYP/ pl  | 2.50 (495) | 7.72 | H-2→L+2 (9%)<br>H-1→L+1 (19%)<br>H→L (55%)                 |

**Table S3:** Maximum conducive chainlength ( $N_{MCC}$ ,  $n_{MCC}$ ) and effective conjugation length ( $N_{ECL}$ ,  $n_{ECL}$ ) of F-MEHPPV, as obtained from experiment and TD-DFT calculations (for details see text).

|       | $N_{MCC}$ | $n_{MCC}$ | $N_{ECL}$ | $n_{ECL}$ |
|-------|-----------|-----------|-----------|-----------|
| Exp:  | 26.7      | 8.2       | 5.3       | 1.1       |
| M06HF | 24.4      | 7.5       | 6.2       | 1.4       |
| B3LYP | 36        | 11.4      | 8.7       | 2.2       |

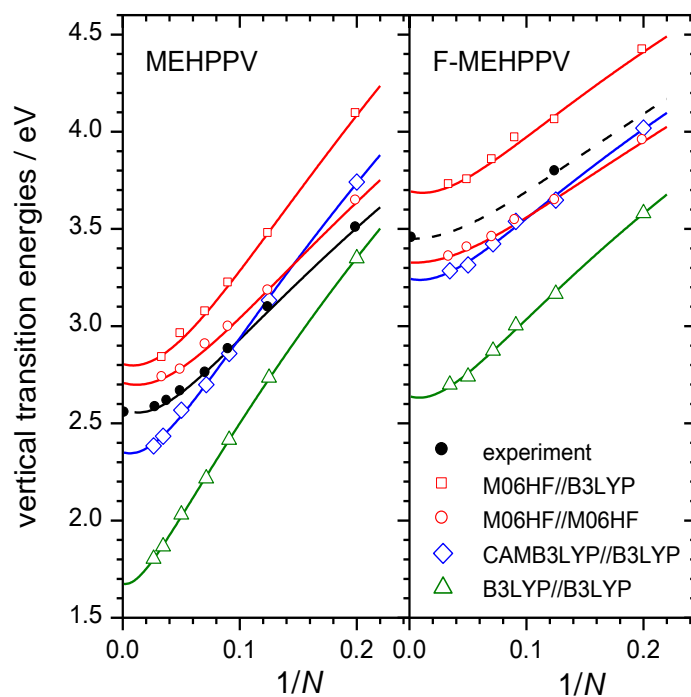

**Fig. S3:** Calculated  $E_{\text{vert}}$  of F-/MEHPPV oligomers as a function of  $1/N$  for different functionals, based on B3LYP geometry optimizations. Solid lines are fits using a modified Kuhn equation.

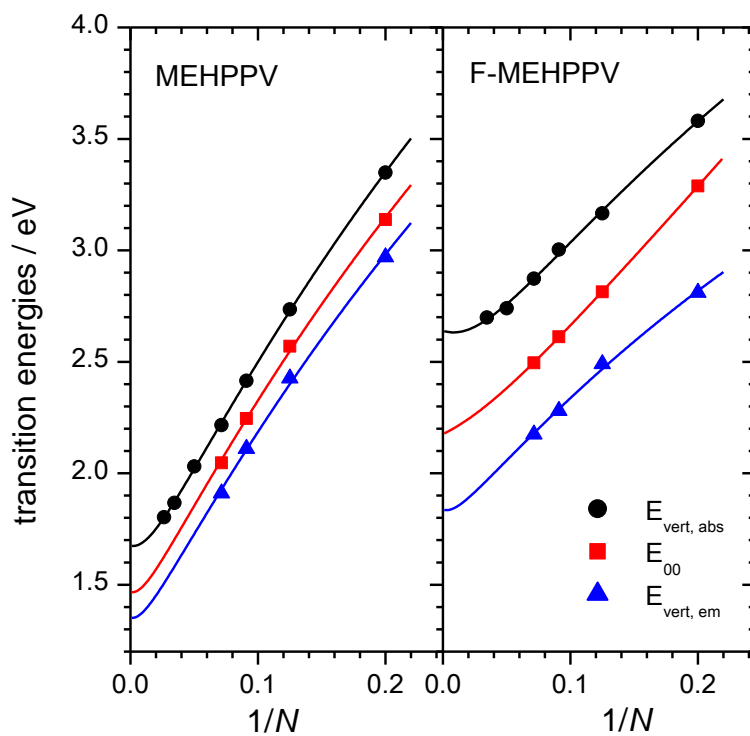

**Fig. S4:** TD-DFT calculated adiabatic ( $E_{00}$ ) and vertical transition energies for absorption and emission ( $E_{\text{vert,abs}}$ ,  $E_{\text{vert,em}}$ ) of F-/MEHPPV oligomers obtained at the B3LYP//B3LYP level of theory. Solid lines are fits using a modified Kuhn equation.

**Table S4:** Calculated HOMO and LUMO energies (eV) for the studied oligomers at B3LYP level (n = number of repeat units)

| compound | n  | HOMO/ eV  |           | LUMO/ eV  |          |
|----------|----|-----------|-----------|-----------|----------|
|          |    | B3LYP/npl | B3LYP /pl | B3LYP/npl | B3LYP/pl |
| MEHPPV   | 1  | -5,048    | -5,025    | -1,385    | -1,430   |
|          | 2  | -4,756    | -4,747    | -1,788    | -1,805   |
|          | 3  | -4,617    | -4,601    | -1,955    | -1,977   |
|          | 4  | -4,531    | -4,517    | -2,048    | -2,072   |
|          | 6  | -4,457    | -4,429    | -2,124    | -2,168   |
|          | 9  | -4,388    | -4,373    | -2,206    | -2,227   |
| F-MEHPPV | 12 | -4,360    | -4,350    | -2,233    | -2,253   |
|          | 1  | -5,278    | -5,095    | -1,251    | -1,462   |
|          | 2  | -5,198    | -4,942    | -1,611    | -1,978   |
|          | 3  | -5,184    | -4,855    | -1,747    | -2,189   |
|          | 4  | -5,161    | -4,808    | -1,852    | -2,307   |
|          | 6  | -5,131    | -4,761    | -1,956    | -2,428   |
|          | 9  | -5,122    | -4,735    | -1,988    | -2,506   |

a) pl, planar; npl, non-planar

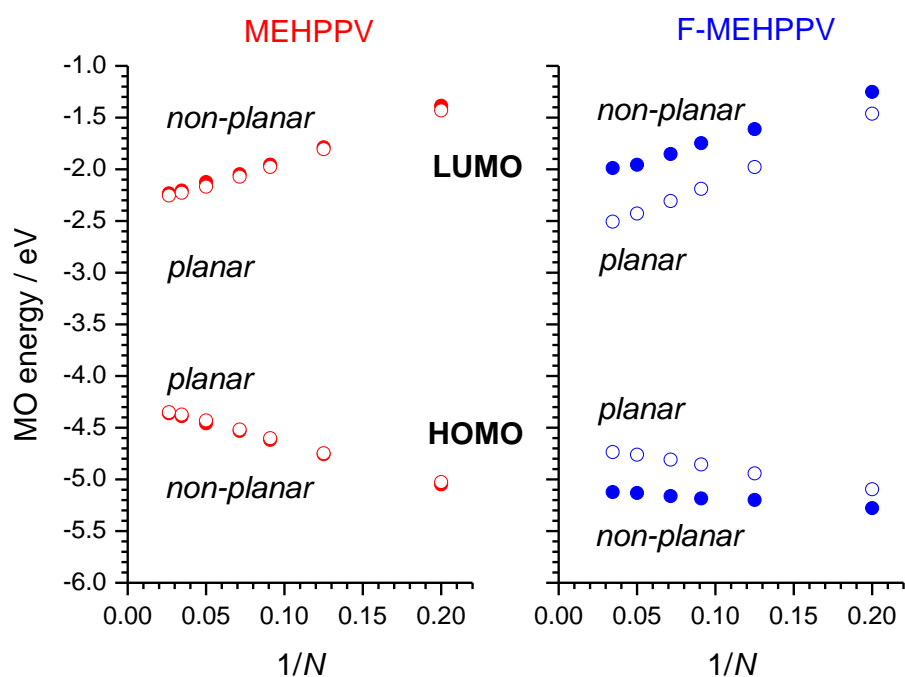

**Fig. S5:** DFT (B3LYP) calculated HOMO and LUMO energies for F-MEHPPV oligomers with non-/planar geometries.
